# Supplementary material for: Microarray evidence of glutaminyl cyclase gene expression in melanoma: implications for tumor antigen specific immunotherapy
Source: PubMed Central journal article supplement (PMC1557589; doi:10.1186/1479-5876-4-27), 2006-07-04
Supplement: 1479-5876-4-27-S1.pdf [file 1479-5876-4-27-S1.pdf]

Table 1: Promax component pattern loading values for the first 4 components of the Ross et al dataset.

---

| Cell line name | Cancer type | Component number |       |       |       |
|----------------|-------------|------------------|-------|-------|-------|
|                |             | 1                | 2     | 3     | 4     |
| MEMALME3M      | Melanoma    | .739*            | .032  | -.012 | -.123 |
| MESKMEL2       | Melanoma    | .647*            | .015  | .059  | .045  |
| MESKMEL5       | Melanoma    | .681*            | .027  | -.010 | .042  |
| MESKMEL28      | Melanoma    | .882*            | -.013 | .040  | -.105 |
| MEM14          | Melanoma    | .743*            | .026  | -.020 | -.038 |
| MEUACC62       | Melanoma    | .748*            | .010  | .017  | -.014 |
| MEUACC257      | Melanoma    | .760*            | -.057 | -.029 | .043  |
| COHT29         | Colon       | -.111            | .692  | .080  | .107  |
| COHCC2998      | Colon       | .042             | .803  | .045  | .022  |
| COHCT116       | Colon       | .068             | .455  | -.068 | -.020 |
| COSW620        | Colon       | .045             | .579  | -.100 | .172  |
| COHCT15        | Colon       | -.019            | .637  | -.054 | .096  |
| COKM12         | Colon       | .012             | .881  | -.036 | -.070 |
| COCOLO205      | Colon       | .052             | .881  | -.078 | .051  |
| REUO31         | Kidney      | .003             | .085  | .546  | -.076 |
| REA498         | Kidney      | -.014            | -.007 | .645  | .004  |
| RECAKI1        | Kidney      | -.030            | -.092 | .646  | .072  |
| RERXF393       | Kidney      | .037             | -.165 | .710  | .072  |
| RE7860         | Kidney      | -.024            | -.013 | .668  | .106  |
| REACHN         | Kidney      | .045             | .052  | .579  | -.066 |
| RETK10         | Kidney      | .029             | .001  | .632  | .018  |

|            |          |       |       |       |       |
|------------|----------|-------|-------|-------|-------|
| LECCRFCEM  | Leukemia | -.053 | .016  | .035  | .816  |
| LEK562     | Leukemia | -.002 | -.071 | -.090 | .685  |
| LEMOLT4    | Leukemia | -.035 | .062  | -.005 | .806  |
| LESR       | Leukemia | -.016 | .023  | .129  | .596  |
| LEHL60     | Leukemia | -.018 | .012  | .019  | .832  |
| LERPMI8226 | Leukemia | .085  | .022  | .134  | .612  |
|            |          |       |       |       |       |
| CNSSNB19   | Brain    | .028  | -.083 | -.046 | .001  |
| CNSSNB75   | Brain    | .241  | -.099 | .005  | -.088 |
| CNSU251    | Brain    | -.060 | -.018 | -.077 | -.043 |
| CNSSF268   | Brain    | -.034 | -.125 | -.093 | .036  |
| CNSSF295   | Brain    | -.015 | .006  | .083  | .078  |
| CNSSF539   | Brain    | .027  | .065  | .019  | .037  |
|            |          |       |       |       |       |
| LCNCIH23   | Lung     | .026  | -.003 | -.025 | .166  |
| LCNCIH522  | Lung     | .027  | -.177 | -.156 | .163  |
| LCA549ATCC | Lung     | -.033 | .049  | .172  | -.101 |
| LCEKVX     | Lung     | -.060 | .054  | .092  | -.148 |
| LCNCIH322M | Lung     | .012  | .573  | -.001 | -.234 |
| LCNCIH460  | Lung     | .072  | -.021 | .117  | .025  |
| LCHOP62    | Lung     | -.078 | .022  | .081  | .035  |
| LCHOP92    | Lung     | .041  | .195  | .128  | -.024 |
| LCNCIH226  | Lung     | -.120 | .167  | .113  | -.159 |
|            |          |       |       |       |       |
| OVOVCAR3   | Ovarian  | .004  | -.032 | -.055 | -.057 |
| OVOVCAR4   | Ovarian  | .017  | -.125 | .121  | -.059 |
| OVOVCAR8   | Ovarian  | .002  | -.117 | .032  | -.072 |
| OVI GROV1  | Ovarian  | .044  | .065  | .235  | .067  |
| OVS KOV3   | Ovarian  | -.050 | .138  | .271  | -.056 |
| OVOVCAR5   | Ovarian  | .018  | .470  | .123  | -.120 |

|              |                  |       |       |       |       |
|--------------|------------------|-------|-------|-------|-------|
| BRMCF7       | Breast           | -.007 | .259  | -.195 | .162  |
| BRMCF7ADFRES | Breast           | .061  | -.109 | .013  | -.045 |
| BRMDAMB231   | Breast           | -.010 | .169  | .074  | .041  |
| BRHS578T     | Breast           | .070  | -.078 | .004  | -.140 |
| BRBT549      | Breast           | -.055 | -.009 | .033  | .071  |
| BRT47D       | Breast           | .035  | .279  | -.076 | .090  |
| PRPC3        | Prostate         | .005  | .195  | -.010 | .132  |
| PRDU145      | Prostate         | -.032 | .187  | .163  | -.005 |
| RESN12C      | Kidney           | -.020 | -.070 | -.029 | .069  |
| BRMDAMB435   | Melanoma/Breast? | .687* | .002  | -.048 | .052  |
| BRMDAN       | Melanoma/Breast? | .736* | .054  | .006  | .105  |
| MELOXIMVI    | Melanoma?        | .146  | -.027 | .096  | .221  |

\* indicates a loading that came from a cell line, which was found to be a member of the Melanoma Cluster, in both the Ross *et al* and Crescenzi & Giuliani studies.
