# Supplementary material for: Microarray evidence of glutaminyl cyclase gene expression in melanoma: implications for tumor antigen specific immunotherapy
Source: PubMed Central journal article supplement (PMC1557589; doi:10.1186/1479-5876-4-27), 2006-07-04
Supplement: 1479-5876-4-27-S4.pdf [file 1479-5876-4-27-S4.pdf]

Table 4: Promax melanoma component pattern loading values for the Györfly *et al* dataset.

---

| Cell Line Name | Cancer type | Loading |
|----------------|-------------|---------|
| ME43           | Melanoma    | .740    |
| MEWO           | Melanoma    | .629    |
| SKMEL13        | Melanoma    | .770    |
| SKMEL19        | Melanoma    | .781    |
| A375           | Melanoma    | .758    |
| COLO699        | Lung        | .556    |
| C8161          | Melanoma    | .076    |
| BT20           | Breast      | .130    |
| R103           | Breast      | .169    |
| R193           | Breast      | .100    |
| SKBR3          | Breast      | .192    |
| MDA231         | Breast      | .160    |
| ES2            | Ovarian     | .214    |
| FUOV1          | Ovarian     | .093    |
| OAW42          | Ovarian     | .154    |
| OVKAR          | Ovarian     | .120    |
| SKOV3          | Ovarian     | .137    |
| HEP3B          | Liver       | .096    |
| SNU182         | Liver       | .079    |
| SNU423         | Liver       | .168    |
| SNU449         | Liver       | .075    |
| SNU475         | Liver       | .215    |
| CX2            | Colon       | .148    |
| HRT18          | Colon       | .078    |
| HT29           | Colon       | .093    |
| DU145          | Prostate    | .153    |
| SW13           | Prostate    | .108    |
| 181P           | Pancreas    | .093    |
| 257P           | Gastric     | .175    |
| DV90           | Lung        | .162    |
